# Supplementary material for: PGE2 is a direct and robust mediator of anion/fluid secretion by human intestinal epithelial cells
Source: PubMed Central journal article supplement (PMC5101536; doi:10.1038/srep36795), 2016-11-09
Supplement: srep36795-s1.pdf [file srep36795-s1.pdf]

**PGE<sub>2</sub> is a direct and robust mediator of anion/fluid secretion by human intestinal epithelial cells.**

Satoru Fujii, Kohei Suzuki, Ami Kawamoto, Fumiaki Ishibashi, Toru Nakata, Tatsuro Murano, Go Ito, Hiromichi Shimizu, Tomohiro Mizutani, Shigeru Oshima, Kiichiro Tsuchiya, Tetsuya Nakamura, Akihiro Araki, Kazuo Ohtsuka, Ryuichi Okamoto and Mamoru Watanabe

## Supplementary Fig. S1

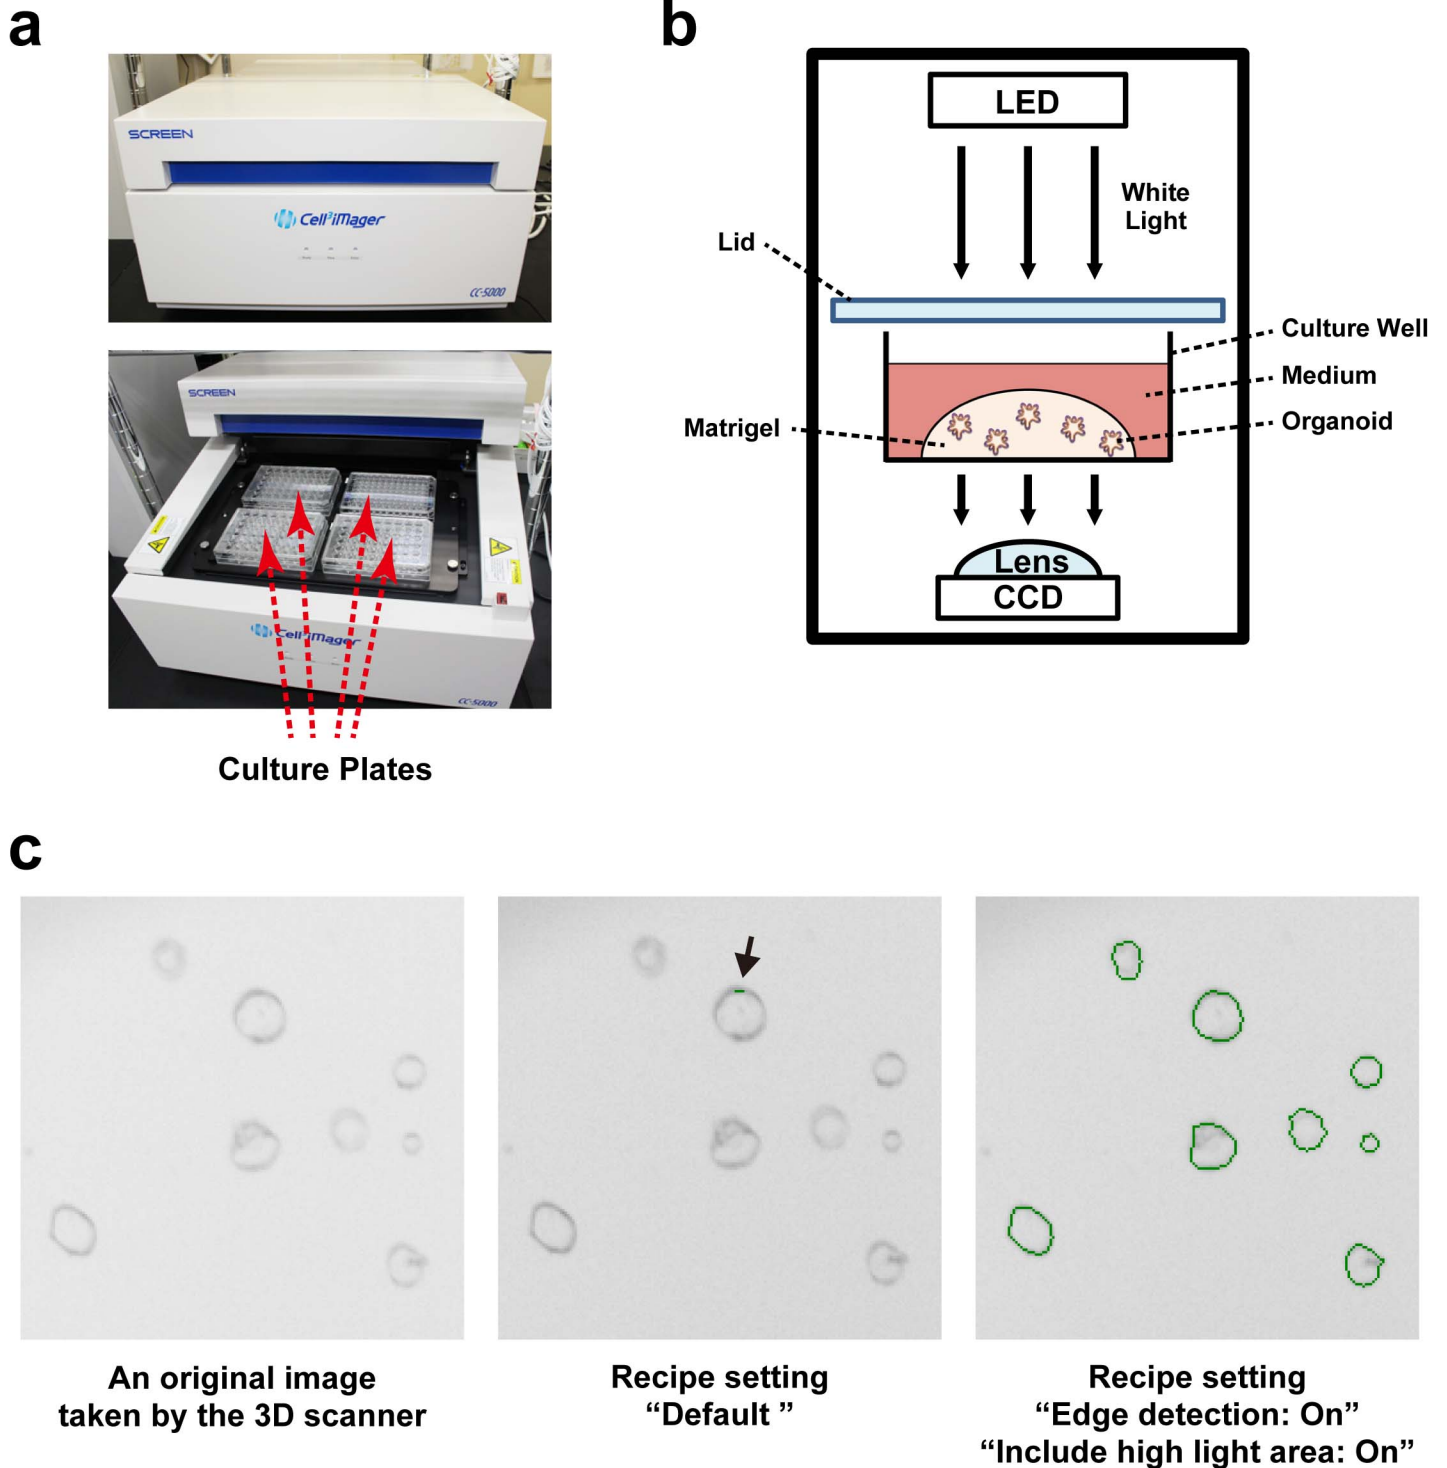

### Supplementary Figure S1. System overview of the 3D-scanning system.

(a) An overview of our 3D-scanning system. A maximum of 4 multi-well plates can be loaded onto the stage. Permission was granted by SCREEN Holdings Co., Ltd. to use the logos and trademarks on the equipment. (b) Scheme of the optical detection system is shown. A LED white light device is fitted above the culture plates and a CCD camera is equipped underneath the culture plates. The system can acquire a full-scan image of a single culture plate at a resolution of 4800 dpi within 1 min. (c) The effect of optimizing the image analysis parameters (recipe) is shown. Only a limited partial edge (black arrow) could be recognized (green line) by the "default" setting (middle panel) without any adjustment. Turning on the "Edge detection" mode and also the "Include high light area" mode greatly improves the detection of the organoid rim (green line). For details of the parameters, please also refer to Supplementary Table S1.

## Supplementary Fig. S2

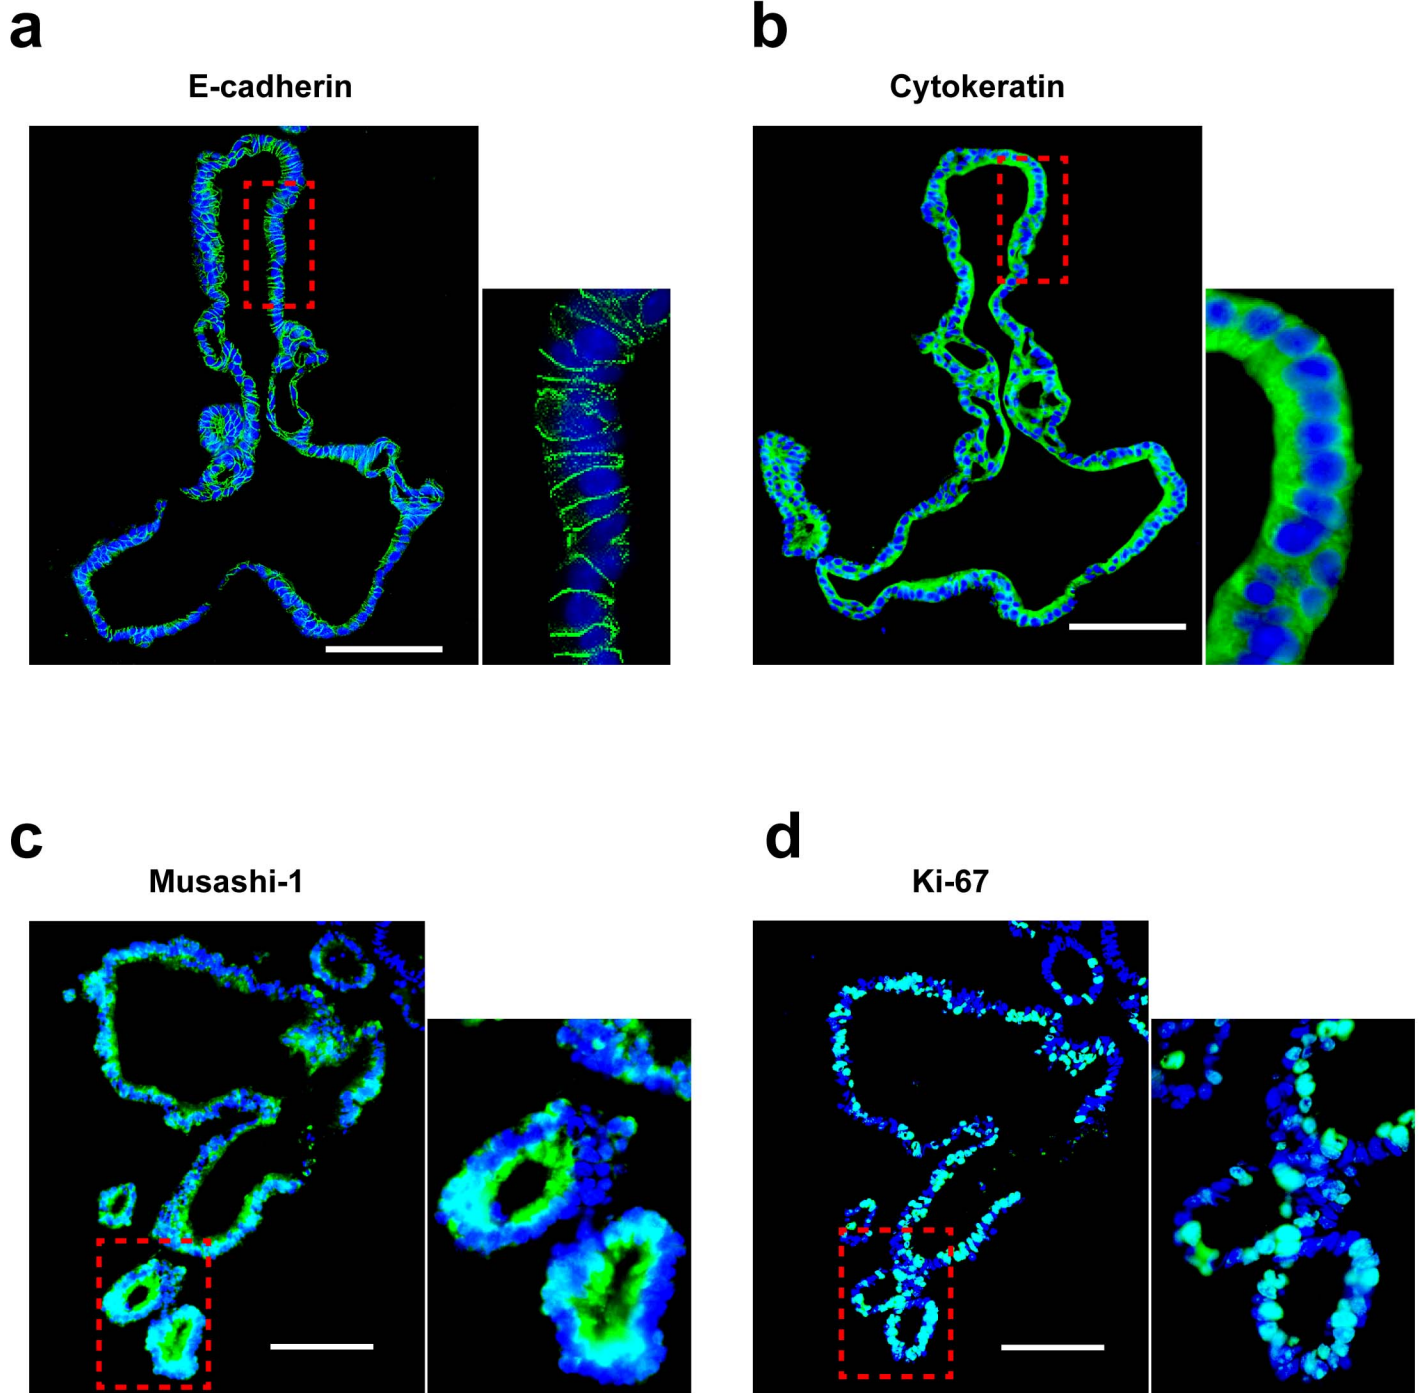

**Supplementary Figure S2. Characteristics of the cells composing human small intestinal organoids.** Immunostaining of E-cadherin (a) and pan-cytokeratin (b) shows positive staining (green) in all of the cells, confirming that those cells are of epithelial origin. Also, a magnified view of the area designated by the red dotted line confirms the basolateral expression of E-cadherin, indicating that these cells maintain their polarity. Also, immunostaining of the stem cell marker Musashi-1 (c) and the proliferative cell marker Ki-67 (d) shows a broad expression throughout the organoid (green), suggesting that the organoids dominantly consist of stem/progenitor cells. A magnified view of the area designated by the red dotted line is shown at the right side. Scale bar represents 100  $\mu$ m.

## Supplementary Fig. S3

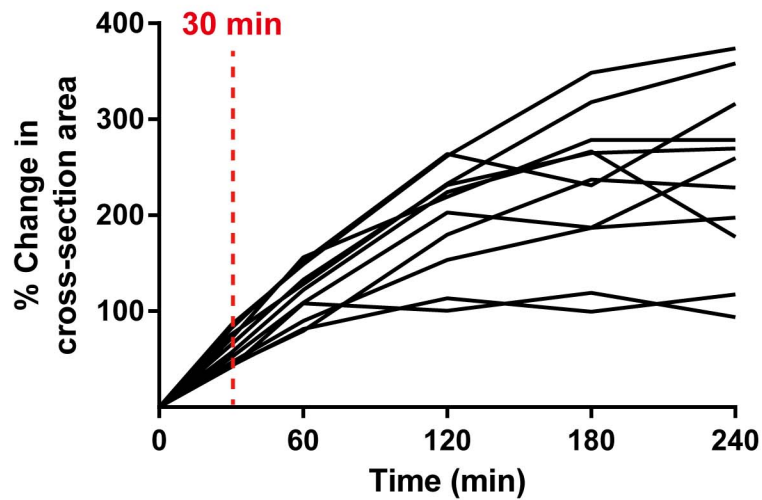

**Supplementary Figure S3. Long-term pulse-chase experiment of the forskolin-induced swelling using human small intestinal organoids.** Organoid swelling was induced by adding forskolin ( $10^{-6}$  M) at the next day of passage, and quantified the swelling response for up to 240 min. Each line represents the response of individual organoids. Note that at time points longer than 30 min, the linear increase in the % change in cross-section area is not necessarily maintained. In the later time period, some organoids show a decrease in their cross-section area, whereas others reach to a plateau. The data were acquired and analyzed based on the time-lapse imaging shown in Supplementary Movie S2 (for up to 240 min), using Image J.

## Supplementary Fig. S4

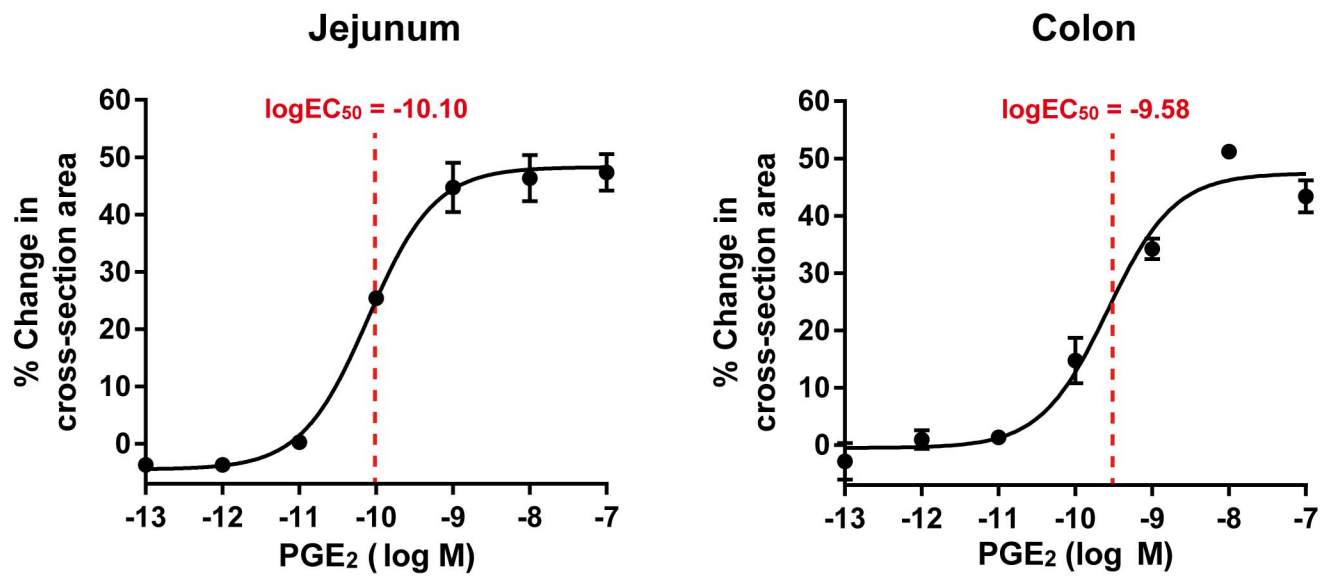

**Supplementary Figure S4. Dose response curve of PGE<sub>2</sub>-induced swelling using the jejunal and the colonic organoids of a single patient.** Another set of data of the dose response curve of PGE<sub>2</sub>-induced organoid swelling acquired from human jejunum-derived and colon-derived organoids. These organoids were established from biopsy specimens that were taken from the jejunum and the ascending colon of a single CD patient.

## Supplementary Fig. S5

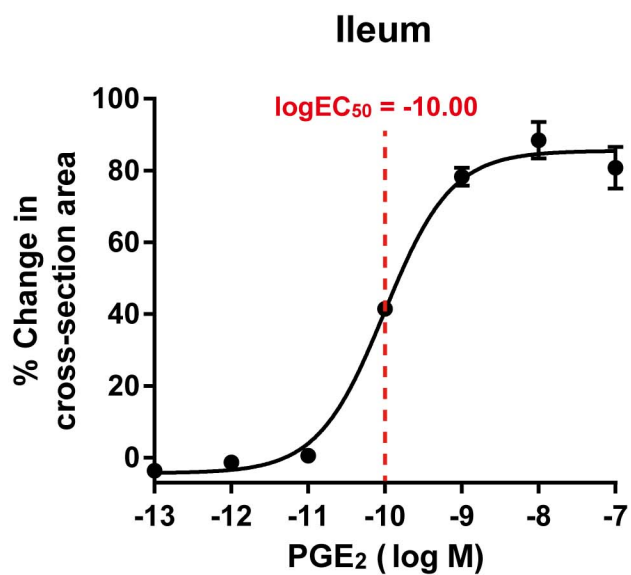

**Supplementary Figure S5. Dose response curve of PGE<sub>2</sub>-induced swelling using the ileal organoids of an UC patient.** A dose response curve of PGE<sub>2</sub>-induced organoid swelling was acquired from ileal organoids of an UC patient. Note that the logEC<sub>50</sub> value is virtually the same as those shown in Fig. 3a.

## Supplementary Fig. S6

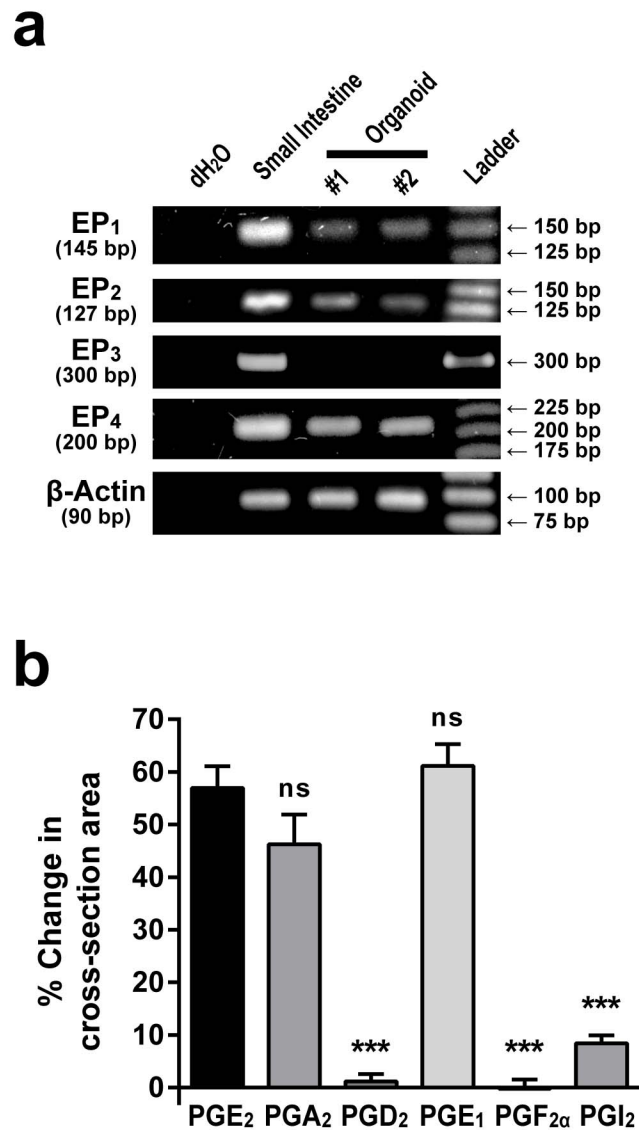

**Supplementary Figure S6. Expression of EP receptors in human small intestinal organoids, and their response to other prostaglandins.** (a) A semi-quantitative RT-PCR analysis of human small intestinal organoids is shown. Expression of EP<sub>1</sub>, EP<sub>2</sub> and EP<sub>4</sub> was confirmed in the subject organoids. However, expression of EP<sub>3</sub> mRNA was below the detection level in the organoids. Results acquired from the whole small intestinal tissue sample are shown as a reference. dH<sub>2</sub>O served as a negative control. The number of bp indicates the length of the targeted amplification region for each gene. (b) Induction of human jejunal organoid swelling by 6 different prostaglandins was examined. The concentration of all the prostaglandins was set to 10<sup>-9</sup> M. Data are shown as the mean±SEM of three independent wells. \*\*\* indicates P<0.0005, \*\*\*\* indicates P<0.0001 as determined by two-sided Student's t-test compared to the data of PGE<sub>2</sub>. ns indicates not significant.

## Supplementary Fig. S7

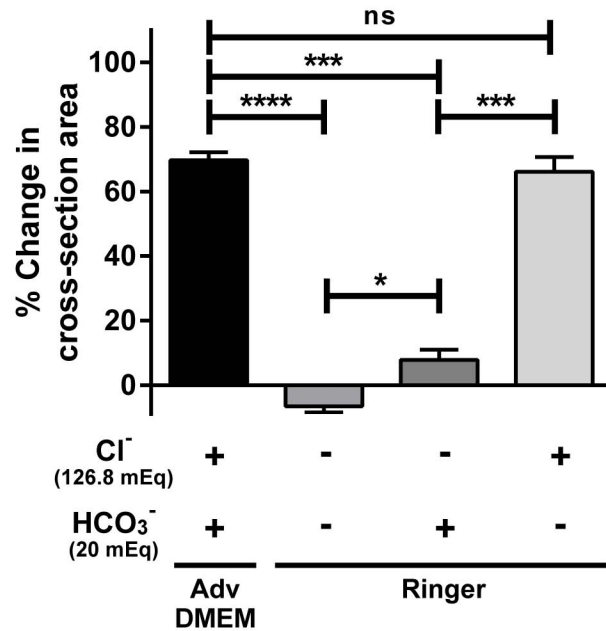

### Supplementary Figure S7. Contribution of HCO<sub>3</sub><sup>-</sup> or Cl<sup>-</sup> to the PGE<sub>2</sub>-induced swelling.

PGE<sub>2</sub>-induced swelling (10<sup>-9</sup> M) of human jejunal organoids was tested under the depletion of Cl<sup>-</sup> alone, HCO<sub>3</sub><sup>-</sup> alone or both Cl<sup>-</sup> and HCO<sub>3</sub><sup>-</sup>. Depletion of both Cl<sup>-</sup> and HCO<sub>3</sub><sup>-</sup> completely abrogated the swelling response. Supplementation of Cl<sup>-</sup> (126.8 mEq) almost completely recovered the swelling response, whereas supplementation of HCO<sub>3</sub><sup>-</sup> (20 mEq) partly recovered the swelling response up to only a minimal extent. Data are shown as the mean±SEM of three independent wells. \* indicates P<0.05, \*\*\* indicates P<0.0005, \*\*\*\* indicates P<0.0001 as determined by two-sided Student's t-test compared between the designated columns. ns indicates not significant.



## Supplementary Fig. S8

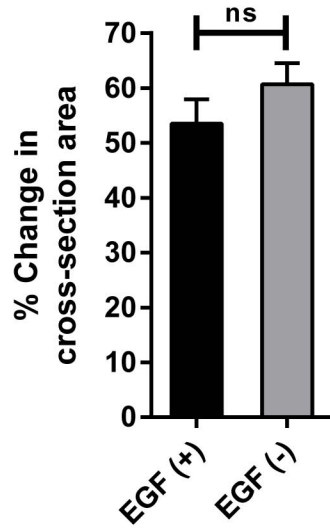

### Supplementary Figure S8. Effect of EGF depletion on the PGE<sub>2</sub>-induced swelling.

Human jejunal organoids were subjected to PGE<sub>2</sub>-induced swelling (10<sup>-9</sup> M) under normal culture condition (EGF(+)) or without EGF (EGF(-)). Depletion of EGF was started 24 h prior to the addition of PGE<sub>2</sub>. Data are shown as the mean±SEM of three independent wells. ns indicates not significant as determined by two-sided Student's t-test.

**Supplementary Movie S1.** Time-lapse imaging of a jejunal organoid swelling induced by forskolin ( $10^{-5}$  M) for up to 60 min at 10 days after passage. Scale bar: 1000  $\mu\text{m}$ .

**Supplementary Movie S2.** Time-lapse imaging of a jejunal organoid swelling induced by forskolin ( $10^{-6}$  M) for up to 360 min at the next day of passage. Scale bar: 100  $\mu\text{m}$ .

**Supplementary Movie S3.** Time-lapse imaging of a jejunal organoid swelling induced by PGE<sub>2</sub> ( $10^{-6}$  M) at 3 days after passage. Scale bar: 100  $\mu\text{m}$ .

**Supplementary Movie S4.** Time-lapse imaging of a jejunal organoid swelling induced by VIP ( $10^{-6}$  M) at 3 days after passage. Scale bar: 100  $\mu\text{m}$ .

**Supplementary Movie S5.** Time-lapse imaging of a jejunal organoid swelling induced by ACh ( $10^{-3}$  M) at 3 days after passage. Scale bar: 100  $\mu\text{m}$ .

**Supplementary Movie S6.** Time-lapse imaging of a jejunal organoid swelling induced by Histamine ( $10^{-3}$  M) at 3 days after passage. Scale bar: 100  $\mu\text{m}$ .

**Supplementary Movie S7.** Time-lapse imaging of a jejunal organoid swelling induced by Serotonin ( $10^{-3}$  M) at 3 days after passage. Scale bar: 100  $\mu\text{m}$ .

**Supplementary Movie S8.** Time-lapse imaging of a jejunal organoid swelling induced by Bradykinin ( $10^{-5}$  M) at 3 days after passage. Scale bar: 100  $\mu\text{m}$ .

**Supplementary Table S1. Details of the image analysis settings**

| Parameters                                    | Function                                                                                                                   | Recipe settings |               |                     |
|-----------------------------------------------|----------------------------------------------------------------------------------------------------------------------------|-----------------|---------------|---------------------|
|                                               |                                                                                                                            | Adjusted value  | Default value | Range of adjustment |
| Allowable object's maximum area (%)           | Maximum size of the object relative to the well size.                                                                      | 25              | 40            | 0.1-100             |
| Debris threshold (%)                          | Threshold to delete an object as a debris, judged by the difference in intensity relative to the background.               | 25              | 100           | 0-100               |
| Compactness upper limit                       | Threshold to delete an object whose value of $\text{circumference}^2 / (4\pi \times \text{Area})$ is above the set number. | 200             | 300           | 0-500               |
| Edge detection                                | Select to use the edge detection mode or not. (Also "Include high light area" is set to "on")                              | On              | Off           | On or Off           |
| Edge candidate                                | Edge intensity below this value is ignored.                                                                                | 20              | Off           | Off or 1-120        |
| Edge threshold                                | Edge intensity over this value is recognized as the true edge.                                                             | 75              | Off           | Off or 0-120        |
| Object edge smoothing                         | Select to use smoothing of the edge mode or not.                                                                           | On              | Off           | On or Off           |
| Spheroid size lower limit ( $\mu\text{m}^2$ ) | Minimum area size of an organoid that should be subjected to analysis.                                                     | 1500            | 0             |                     |
| Spheroid size upper limit ( $\mu\text{m}^2$ ) | Maximum area size of an organoid that should be subjected to analysis.                                                     | 2400000         | 2147483647    |                     |
| Spheroid volume lower limit                   | Minimum suspected volume size of an organoid that should be subjected to analysis.                                         | 0               | 0             |                     |
| Spheroid volume upper limit                   | Maximum suspected volume size of an organoid that should be subjected to analysis.                                         | 2400000         | 2147483647    |                     |
| Circularity lower limit (%)                   | Object whose value of $(4\pi \times \text{Area}) / \text{circumference}^2$ is lower than the set limit is ignored.         | 45              | 0             | 0-100               |
| Sharpness lower limit                         | Object with a sharpness value below the set limit is ignored.                                                              | 0               | 1             | 0-100               |
| Spheroid density upper limit                  | Maximum mean optical density value of the subject organoids.                                                               | 30              | 300           | 0-400               |

**Supplementary Table S2****Composition of normal, Cl<sup>-</sup>-free, and HCO<sub>3</sub><sup>-</sup>-supplemented Cl<sup>-</sup>-free Ringer's solutions**

|                                 | Ringer's solution | Cl <sup>-</sup> -free Ringer's solution | HCO <sub>3</sub> <sup>-</sup> -supplemented Cl <sup>-</sup> -free Ringer's solution |
|---------------------------------|-------------------|-----------------------------------------|-------------------------------------------------------------------------------------|
| NaCl                            | 122 mM            | None                                    | None                                                                                |
| MgCl <sub>2</sub>               | 1.2 mM            | None                                    | None                                                                                |
| CaCl <sub>2</sub>               | 1.2 mM            | None                                    | None                                                                                |
| K <sub>2</sub> HPO <sub>4</sub> | 2.4 mM            | 2.4 mM                                  | 2.4 mM                                                                              |
| KH <sub>2</sub> PO <sub>4</sub> | 0.6 mM            | 0.6 mM                                  | 0.6 mM                                                                              |
| HEPES                           | 20 mM             | 20 mM                                   | None                                                                                |
| Glucose                         | 10 mM             | 10 mM                                   | 10 mM                                                                               |
| Na gluconate                    | None              | 122 mM                                  | 122 mM                                                                              |
| Mg gluconate                    | None              | 1.2 mM                                  | 1.2 mM                                                                              |
| Ca gluconate                    | None              | 4 mM                                    | 4 mM                                                                                |
| NaHCO <sub>3</sub>              | None              | None                                    | 20 mM                                                                               |
| pH                              | 7.3               | 7.3                                     | 7.3                                                                                 |
